# Supplementary material for: Discrepancies in Persistent Dry Eye Signs and Symptoms in Bilateral Pseudophakic Patients
Source: PubMed Central journal article supplement (PMC6406599; doi:10.3390/jcm8020211), 2019-02-07
Supplement: jcm-08-00211-s001.pdf [file jcm-08-00211-s001.pdf]

**Table S1.** Univariable and multivariable logistic regression analyses of dry eye subjective symptoms and objective signs in relation to the history of cataract surgeries in both sexes.

| Characteristics                    | Men                        |         |                                |         | Women                      |         |                                |         |
|------------------------------------|----------------------------|---------|--------------------------------|---------|----------------------------|---------|--------------------------------|---------|
|                                    | Univariable OR<br>(95% CI) | P Value | Multivariable OR<br>(95% CI)** | P Value | Univariable OR<br>(95% CI) | P Value | Multivariable OR<br>(95% CI)** | P Value |
| <b>Subjective Symptoms</b>         |                            |         |                                |         |                            |         |                                |         |
| Dry sensation                      | 1.02 (0.44–2.38)           | 0.95    | 1.00 (0.40–2.55)               | 0.98    | 0.63 (0.40–0.99)           | 0.05    | 1.04 (0.63–1.72)               | 0.88    |
| Foreign-body sensation             | 1.72 (0.76–3.87)           | 0.19    | 1.09 (0.44–2.71)               | 0.85    | 1.03 (0.65–1.61)           | 0.91    | 1.02 (0.63–1.66)               | 0.93    |
| Ocular pain                        | 0.94 (0.12–7.57)           | 0.95    | 1.79 (0.19–17.1)               | 0.61    | 0.77 (0.36–1.64)           | 0.50    | 0.85 (0.38–1.91)               | 0.70    |
| Ocular fatigue                     | 0.98 (0.51–1.89)           | 0.95    | 1.19 (0.58–2.44)               | 0.63    | 0.74 (0.49–1.12)           | 0.16    | 0.94 (0.60–1.47)               | 0.79    |
| Sensitivity to bright light        | 0.92 (0.38–2.24)           | 0.85    | 0.89 (0.34–2.32)               | 0.80    | 0.54 (0.31–0.95)           | 0.03    | 0.49 (0.27–0.88)               | 0.02    |
| Blurred vision                     | 1.26 (0.63–2.55)           | 0.51    | 0.88 (0.41–1.89)               | 0.74    | 0.83 (0.50–1.39)           | 0.49    | 0.76 (0.44–1.31)               | 0.32    |
| <b>Objective Signs<sup>†</sup></b> |                            |         |                                |         |                            |         |                                |         |
| Short tear break-up time           | 1.59 (0.91–2.78)           | 0.11    | 1.36 (0.74–2.50)               | 0.32    | 1.06 (0.71–1.58)           | 0.80    | 1.17 (0.76–1.79)               | 0.48    |
| Corneal epitheliopathy             | 1.96 (0.98–3.93)           | 0.06    | 1.93 (0.88–4.23)               | 0.10    | 1.41 (0.94–2.12)           | 0.10    | 1.53 (0.98–2.39)               | 0.06    |
| Short maximum blinking interval    | 1.50 (0.80–2.83)           | 0.21    | 0.90 (0.44–1.82)               | 0.77    | 1.28 (0.86–1.90)           | 0.22    | 1.00 (0.65–1.52)               | 0.98    |

<sup>†</sup> Abnormal ocular surface parameters were defined as follows: tear break-up time  $\leq 5$  s, the presence of corneal epitheliopathy (keratoconjunctival staining score  $\geq 3$  points according to the Japanese dry eye criteria), and maximum blinking interval  $< 10$  s. <sup>\*\*</sup> Adjusted for age (in 10-year age groups), sex (male vs. female), and the use of dry eye medications (yes vs. no). Abbreviations: CI: confidence interval; OR: odds ratio.

**Table S2.** Association between maximum blinking interval and other dry eye objective signs in the no subjective dry eye symptoms strata \*

| Characteristics                          | Maximum Blinking Interval                  |                               |                       |                       |                                    |                       |
|------------------------------------------|--------------------------------------------|-------------------------------|-----------------------|-----------------------|------------------------------------|-----------------------|
|                                          | Dry Sensation<br>(-)                       | Foreign-Body Sensation<br>(-) | Ocular Pain<br>(-)    | Ocular Fatigue<br>(-) | Sensitivity to Bright Light<br>(-) | Blurred Vision<br>(-) |
|                                          | Spearman Correlation Coefficient (P Value) |                               |                       |                       |                                    |                       |
| <b>Tear Break-Up Time</b>                |                                            |                               |                       |                       |                                    |                       |
| No surgery                               | 0.28<br>( $<0.001$ )                       | 0.30<br>( $<0.001$ )          | 0.27<br>( $<0.001$ )  | 0.26<br>( $<0.001$ )  | 0.28<br>( $<0.001$ )               | 0.26<br>( $<0.001$ )  |
| Postcataract surgeries                   | 0.24<br>(0.004)                            | 0.30<br>( $<0.001$ )          | 0.27<br>( $<0.001$ )  | 0.27<br>(0.003)       | 0.26<br>(0.001)                    | 0.23<br>(0.005)       |
| <b>Keratoconjunctival Staining Score</b> |                                            |                               |                       |                       |                                    |                       |
| No surgery                               | -0.15<br>( $<0.001$ )                      | -0.18<br>( $<0.001$ )         | -0.15<br>( $<0.001$ ) | -0.16<br>( $<0.001$ ) | -0.15<br>( $<0.001$ )              | -0.16<br>( $<0.001$ ) |
| Postcataract surgeries                   | -0.14<br>(0.10)                            | -0.17<br>(0.05)               | -0.18<br>(0.02)       | -0.26<br>(0.004)      | -0.22<br>(0.007)                   | -0.16<br>(0.05)       |

\* Spearman correlation coefficients between maximum blinking interval and tear break-up time or keratoconjunctival staining score.
